# Supplementary material
Source: PubMed Central journal article supplement (PMC2638223)
Supplement: den110_1.pdf [file den110_1.pdf]

Supplementary Data: TGF $\beta$  superfamily primers and conditions for RTPCR

| Ligand                                  | Positive control           | Primer sequence                                  | Product size (bp) | Annealing temp. (C) |
|-----------------------------------------|----------------------------|--------------------------------------------------|-------------------|---------------------|
| Activin $\beta$ A <sup>*</sup>          | Term placenta              | CGAGGAAGTGGGCTTAAAGGG<br>TCACAGGCAATCCGAACGTCCAG | 159               | 59.2                |
| Activin $\beta$ B <sup>*</sup>          | Term placenta              | GTGAAGCGGCACATCTTGAG<br>GCGAAGCTGATGATTTTCGGAAA  | 209               | 63.4                |
| BMP2                                    | Pregnant mouse endometrium | CCCCCTACATGCTAGACCTGT<br>ACATCGTTTCTGGTAGTTCTTCC | 150               | 63.4                |
| BMP4                                    | Mature rat ovary           | TTCCTGGTAACCGAATGCTGA<br>CCCTGAATCTCGGCGACTTTT   | 115               | 64.8                |
| BMP7                                    | Cycling mouse endometrium  | TCGGCACCCATGTTCATGC<br>TCGGACTGGCCCTGAAGAAA      | 98                | 64.8                |
| GDF5<br>(Nakamura <i>et al.</i> , 2003) | Rat ovary                  | ATGAGACTCCCCAAACTCCTCAC<br>TGTCTGCCTGGTGCCTCCCT  | 249               | 64.8                |
| GDF8<br>(Milan <i>et al.</i> , 2004)    | Mouse heart                | CATGATCTTGCTGTAACCTTCC<br>CGATAATCCAATCCCATCC    | 360               | 63.4                |
| GDF11                                   | Term placenta              | GATCCTGGACCTACACGACTT<br>GGCCATGCTAATGACGGTCT    | 103               | 64.8                |
| Nodal<br>(Munir <i>et al.</i> , 2004)   | JEG3 cells                 | AGACATCATCCGCAGCCTACA<br>GTCCATCTGAAACCGCTCTAAG  | 330               | 59.2                |
| TGF $\beta$ 1                           | Term placenta              | CTGCATCTGGTCACGGTCG<br>CCTCGGGCTCAGGATACTCT      | 201               | 63.4                |
| TGF $\beta$ 2                           | Term Placenta              | TCAGCCTCTCTGTCCACTT<br>CATCACCGTTGGCTCAGGG       | 151               | 65.1                |
| TGF $\beta$ 3                           | Term Placenta              | GGCCAGATCCTGTCCAAGC<br>GTGGGTTTCCACCATTAGCAC     | 128               | 56.8                |

<sup>\*</sup> Sequences provided by W. Vale at Salk Institute. All other primer sequences were chosen from Primerbank<sup>®</sup>, or from cited references.

### **References for Supplementary Data**

Milan G, Dalla Nora E, Pilon C, Pagano C, Granzotto M, Manco M, Mingrone G and Vettor R (2004) Changes in muscle myostatin expression in obese subjects after weight loss. *J Clin Endocrinol Metab* 89, 2724-2727.

Munir S, Xu G, Wu Y, Yang B, Lala PK and Peng C (2004) Nodal and ALK7 inhibit proliferation and induce apoptosis in human trophoblast cells. *J Biol Chem* 279, 31277-31286.

Nakamura T, Yamamoto M, Tamura M and Izumi Y (2003) Effects of growth/differentiation factor-5 on human periodontal ligament cells. *J Periodontal Res* 38, 597-605.
